# Supplementary material for: Kinsenoside ameliorates intervertebral disc degeneration through the activation of AKT-ERK1/2-Nrf2 signaling pathway
Source: publisher site journal article supplement (doi:10.18632/aging.102302), 2019-09-23
Supplement: Supplementary file [file aging-v11i18-102302-supplementary-material-SD1.pdf]

## SUPPLEMENTARY FIGURE

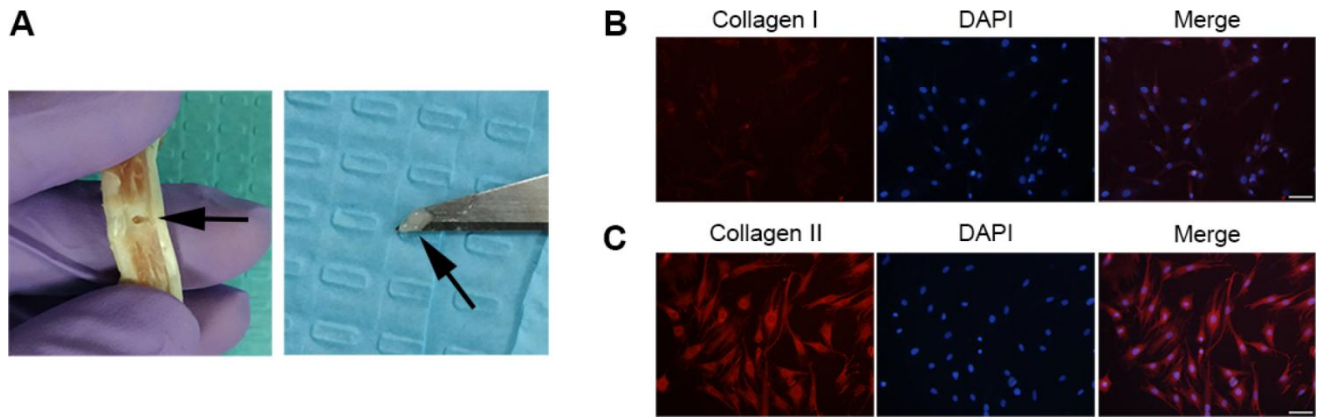

**Supplementary Figure 1. Extraction steps and identification methods of NPCs.** (A) The gel-like NP tissues were separated from the tails of rats using a pointed blade. (B, C) Immunofluorescence results of Collagen I and Collagen II in NPCs (scale bar: 50 $\mu$ m).
